# Supplementary material for: Selection-Driven Extinction Dynamics for Group II Introns in Enterobacteriales
Source: PubMed Central journal article supplement (PMC3522654; doi:10.1371/journal.pone.0052268), 2012-12-14
Supplement: pone.0052268.s002.pdf [file pone.0052268.s002.pdf]

## List of the 90 Enterobacteriaceae sequenced strains, with their full-length and fragmented intron abundance in plasmids and chromosomes

| genus                                | group       | strain                                | GenBank accession | number of free plasmids | group II introns in plasmids |           | group II introns in chromosome |           | total      | strain-specific copies |
|--------------------------------------|-------------|---------------------------------------|-------------------|-------------------------|------------------------------|-----------|--------------------------------|-----------|------------|------------------------|
|                                      |             |                                       |                   |                         | full-length                  | fragments | full-length                    | fragments |            |                        |
| <b>Escherichia/Shigella</b>          |             |                                       |                   |                         |                              |           |                                |           |            |                        |
|                                      | <b>B2</b>   | <b>E. coli O127H6 str. E2348/69</b>   | NC_011601         | 2                       | .                            | .         | .                              | .         |            | .                      |
|                                      |             | <b>E. coli 536</b>                    | NC_008253         |                         | .                            | .         | 1                              | .         | <b>1</b>   | 1                      |
|                                      |             | <b>E. coli CFT073</b>                 | NC_004431         |                         | .                            | .         | 1                              | 1         | <b>2</b>   | 1                      |
|                                      |             | <b>E. coli ED1a</b>                   | NC_011745         |                         | .                            | .         | 5                              | .         | <b>5</b>   | 3                      |
|                                      |             | <b>E. coli S88</b>                    | NC_011742         | 1                       | .                            | .         | 1                              | 1         | <b>2</b>   |                        |
|                                      |             | <b>E. coli APEC_O1</b>                | NC_008563         | 2                       | .                            | .         | 1                              | 1         | <b>2</b>   |                        |
|                                      |             | <b>E. coli UT189</b>                  | NC_007946         | 1                       | <i>I</i>                     | <i>I</i>  | .                              | .         | <b>2</b>   |                        |
|                                      | <b>D</b>    | <b>E. coli IA139</b>                  | NC_011750         |                         | .                            | .         | 15                             | .         | <b>15</b>  | 15                     |
|                                      |             | <b>E. coli SMS-3-5</b>                | NC_010498         | 4                       | .                            | .         | 1                              | 2         | <b>3</b>   | 3                      |
|                                      |             | <b>E. coli UMN026</b>                 | NC_011751         | 2                       | <i>I</i>                     | <i>I</i>  | 1                              | .         | <b>3</b>   | 1                      |
|                                      | <b>A</b>    | <b>E. coli ATCC 8739</b>              | NC_010468         |                         | .                            | .         | 1                              | .         | <b>1</b>   |                        |
|                                      |             | <b>E. coli HS</b>                     | NC_009800         |                         | .                            | .         | .                              | .         |            |                        |
|                                      |             | <b>E. coli BL21</b>                   | NC_012892         |                         | .                            | .         | .                              | 1         | <b>1</b>   |                        |
|                                      |             | <b>E. coli BL21-Gold (DE3)</b>        | NC_012947         |                         | .                            | .         | .                              | 1         | <b>1</b>   |                        |
|                                      |             | <b>E. coli B str. REL606</b>          | NC_012967         |                         | .                            | .         | .                              | 1         | <b>1</b>   |                        |
|                                      |             | <b>E. coli K12 BW2952</b>             | NC_012759         |                         | .                            | .         | .                              | 1         | <b>1</b>   |                        |
|                                      |             | <b>E. coli K12 substr. DH10B</b>      | NC_010473         |                         | .                            | .         | .                              | 1         | <b>1</b>   |                        |
|                                      |             | <b>E. coli K12 substr. MG1655</b>     | NC_000913         |                         | .                            | .         | .                              | 1         | <b>1</b>   |                        |
|                                      |             | <b>E. coli K12 substr. W3110</b>      | AC_000091         |                         | .                            | .         | .                              | 1         | <b>1</b>   |                        |
|                                      | <b>B1</b>   | <b>E. coli IA11</b>                   | NC_011741         |                         | .                            | .         | .                              | 2         | <b>2</b>   |                        |
|                                      |             | <b>E. coli SE11</b>                   | NC_011415         | 6                       | .                            | 2         | .                              | 2         | <b>4</b>   | 2                      |
|                                      |             | <b>E. coli 55989</b>                  | NC_011748         |                         | .                            | .         | 6                              | 1         | <b>7</b>   | 5                      |
|                                      |             | <b>E. coli E24377A</b>                | NC_009801         | 6                       | 4                            | 2         | 3                              | 3         | <b>12</b>  | 9                      |
|                                      | <b>SS</b>   | <b>S. sonnei Ss046</b>                | NC_007384         | 4                       | .                            | 8         | .                              | 1         | <b>9</b>   |                        |
|                                      |             | <b>S. boydii Sb227</b>                | NC_007613         | 1                       | .                            | 5         | .                              | 1         | <b>6</b>   |                        |
|                                      |             | <b>S. boydii CDC 3083-94</b>          | NC_010658         | 5                       | .                            | 10        | .                              | 1         | <b>11</b>  | 1                      |
|                                      | <b>S3</b>   | <b>S. flexneri Sf_5a_8401</b>         | NC_008258         |                         | .                            | .         | .                              | 1         | <b>1</b>   |                        |
|                                      |             | <b>S. flexneri 2a str. 301</b>        | NC_004337         | 1                       | .                            | 10        | .                              | 1         | <b>12</b>  | 2                      |
|                                      |             | <b>S. flexneri 2a 2457T</b>           | NC_004741         |                         | .                            | .         | 1                              | 1         | <b>2</b>   |                        |
|                                      | <b>S.D.</b> | <b>S. dysenteriae Sd197</b>           | NC_007606         | 2                       | .                            | 6         | .                              | .         | <b>6</b>   |                        |
|                                      | <b>E</b>    | <b>E. coli O157H7 str. EDL933</b>     | NC_002655         | 1                       | <i>I</i>                     | .         | .                              | 1         | <b>2</b>   |                        |
|                                      |             | <b>E. coli O157H7 str. Sakai</b>      | NC_002695         | 2                       | <i>I</i>                     | .         | .                              | 1         | <b>2</b>   |                        |
|                                      |             | <b>E. coli O157H7 str. EC4115</b>     | NC_011353         | 2                       | .                            | .         | .                              | 1         | <b>1</b>   |                        |
|                                      |             | <b>E. coli O157H7 str. TW14359</b>    | NC_013008         | 1                       | .                            | .         | .                              | 1         | <b>1</b>   |                        |
|                                      |             | <b>E. fergusonii ATCC 35469</b>       | NC_011740         | 1                       | .                            | <i>I</i>  | .                              | .         | <b>1</b>   | 1                      |
| <b>genus average/sub-TOTAL</b>       |             |                                       |                   | <b>1.26</b>             | <b>8</b>                     | <b>46</b> | <b>38</b>                      | <b>30</b> | <b>122</b> | <b>44</b>              |
| <i>sub-TOTAL for distinct copies</i> |             |                                       |                   |                         | 6                            | 20        | 34                             | 7         | 67         | 44                     |
| <b>Yersinia</b>                      |             |                                       |                   |                         |                              |           |                                |           |            |                        |
|                                      |             | <b>Y. pestis Angola</b>               | NC_010159         | 2                       | .                            | <i>I</i>  | .                              | .         | <b>1</b>   |                        |
|                                      |             | <b>Y. pestis Antiqua</b>              | NC_008150         | 3                       | .                            | <i>I</i>  | .                              | .         | <b>1</b>   |                        |
|                                      |             | <b>Y. pestis Microtus str. 91001</b>  | NC_005810         | 4                       | .                            | <i>I</i>  | .                              | .         | <b>1</b>   |                        |
|                                      |             | <b>Y. pestis CO92</b>                 | NC_003143         | 3                       | .                            | <i>I</i>  | .                              | .         | <b>1</b>   |                        |
|                                      |             | <b>Y. pestis KIM 10</b>               | NC_004088         | 1                       | .                            | <i>I</i>  | .                              | .         | <b>1</b>   |                        |
|                                      |             | <b>Y. pestis Nepal516</b>             | NC_008149         | 2                       | .                            | <i>I</i>  | .                              | .         | <b>1</b>   |                        |
|                                      |             | <b>Y. pestis Pestoides F</b>          | NC_009381         | 2                       | .                            | <i>I</i>  | .                              | .         | <b>1</b>   |                        |
|                                      |             | <b>Y. enterocolitica 8081</b>         | NC_008800         | 1                       | .                            | <i>I</i>  | .                              | .         | <b>1</b>   | 1                      |
|                                      |             | <b>Y. pseudotuberculosis IP 31768</b> | NC_009708         | 2                       | .                            | .         | .                              | .         |            |                        |
|                                      |             | <b>Y. pseudotuberculosis IP 32953</b> | NC_006155         | 2                       | .                            | .         | .                              | .         |            |                        |
|                                      |             | <b>Y. pseudotuberculosis PB1/+</b>    | NC_010634         | 1                       | .                            | .         | .                              | .         |            |                        |
|                                      |             | <b>Y. pseudotuberculosis YPIII</b>    | NC_010465         |                         | .                            | .         | .                              | .         |            |                        |
| <b>genus average/sub-TOTAL</b>       |             |                                       |                   | <b>1.92</b>             | <b>8</b>                     | <b>8</b>  | <b>8</b>                       | <b>8</b>  | <b>8</b>   | <b>1</b>               |
| <i>sub-TOTAL for distinct copies</i> |             |                                       |                   |                         |                              | 2         |                                |           | 2          | 1                      |
| <b>Klebsiella</b>                    |             |                                       |                   |                         |                              |           |                                |           |            |                        |
|                                      |             | <b>K. pneumoniae 342</b>              | NC_011283         | 2                       | .                            | .         | .                              | .         |            |                        |
|                                      |             | <b>K. pneumoniae MGH 78578</b>        | NC_009648         | 5                       | <i>I</i>                     | <i>I</i>  | 1                              | 1         | <b>4</b>   | 4                      |
|                                      |             | <b>K. pneumoniae NTUH-K2044</b>       | NC_012731         | 1                       | .                            | .         | .                              | 1         | <b>1</b>   | 1                      |
| <b>genus average/sub-TOTAL</b>       |             |                                       |                   | <b>2.67</b>             | <b>1</b>                     | <b>1</b>  | <b>1</b>                       | <b>2</b>  | <b>5</b>   | <b>5</b>               |
| <i>sub-TOTAL for distinct copies</i> |             |                                       |                   |                         | 1                            | 1         | 1                              | 2         | 5          | 5                      |
| <b>Dickeya</b>                       |             |                                       |                   |                         |                              |           |                                |           |            |                        |
|                                      |             | <b>D. dadantii Ech703</b>             | NC_012880         |                         | .                            | .         | 1                              | .         | <b>1</b>   |                        |
|                                      |             | <b>D. zeae Ech1591</b>                | NC_012912         |                         | .                            | .         | 3                              | .         | <b>3</b>   | 2                      |
| <b>genus average/sub-TOTAL</b>       |             |                                       |                   |                         |                              |           | <b>4</b>                       |           | <b>4</b>   | <b>2</b>               |
| <i>sub-TOTAL for distinct copies</i> |             |                                       |                   |                         |                              |           | 3                              |           | 3          | 2                      |
| <b>Photobacterium</b>                |             |                                       |                   |                         |                              |           |                                |           |            |                        |
|                                      |             | <b>P. luminescens TTO1</b>            | NC_005126         |                         | .                            | .         | 2                              | 7         | <b>9</b>   | 8                      |
|                                      |             | <b>P. asymbiotica ATCC 43949</b>      | NC_012962         | 1                       | .                            | .         | .                              | 1         | <b>1</b>   |                        |
| <b>genus average/sub-TOTAL</b>       |             |                                       |                   | <b>0.5</b>              |                              |           | <b>2</b>                       | <b>8</b>  | <b>10</b>  | <b>8</b>               |
| <i>sub-TOTAL for distinct copies</i> |             |                                       |                   |                         |                              |           | 2                              | 7         | 9          | 8                      |

Table S1

|                                      |                                          |           |       |   |   |    |   |    |    |
|--------------------------------------|------------------------------------------|-----------|-------|---|---|----|---|----|----|
| <b>Sodalis</b>                       |                                          |           |       |   |   |    |   |    |    |
|                                      | S. glossinidius 'morsitans'              | NC_007712 | 3     | . | 1 | 3  | 4 | 8  | 8  |
| <b>genus average/sub-TOTAL</b>       |                                          |           | 3     | 1 | 3 | 4  | 8 | 8  | 8  |
| <i>sub-TOTAL for distinct copies</i> |                                          |           |       | 1 | 3 | 4  | 8 | 8  | 8  |
| <b>Serratia</b>                      |                                          |           |       |   |   |    |   |    |    |
|                                      | S. proteamaculans 568                    | NC_009832 | 1     | . | . | 3  |   | 3  | 3  |
| <b>genus average/sub-TOTAL</b>       |                                          |           | 1     |   |   | 3  | 3 | 3  | 3  |
| <i>sub-TOTAL for distinct copies</i> |                                          |           |       |   |   | 3  | 3 | 3  | 3  |
| <b>Candidatus Hamiltonella</b>       |                                          |           |       |   |   |    |   |    |    |
|                                      | H. defensa 5AT                           | NC_012751 | 1     | 1 | . | 29 | 8 | 38 | 38 |
| <b>genus average/sub-TOTAL</b>       |                                          |           | 1     | 1 |   | 29 | 8 | 38 | 38 |
| <i>sub-TOTAL for distinct copies</i> |                                          |           |       | 1 |   | 29 | 8 | 38 | 38 |
| <b>Buchnera</b>                      |                                          |           |       |   |   |    |   |    |    |
|                                      | <b>B. aphidicola Bp</b>                  | NC_004545 | 1     | . | . | .  | . | .  | .  |
|                                      | <b>B. aphidicola 5A</b>                  | NC_011833 |       | . | . | .  | . | .  | .  |
|                                      | <b>B. aphidicola Cc</b>                  | NC_008513 | 1     | . | . | .  | . | .  | .  |
|                                      | <b>B. aphidicola Sg</b>                  | NC_004061 |       | . | . | .  | . | .  | .  |
|                                      | <b>B. aphidicola Tuc7</b>                | NC_011834 |       | . | . | .  | . | .  | .  |
|                                      | <b>B. aphidicola APS</b>                 | NC_002528 | 2     | . | . | .  | . | .  | .  |
| <b>genus average/sub-TOTAL</b>       |                                          |           | 0.67  |   |   |    |   |    |    |
| <i>sub-TOTAL for distinct copies</i> |                                          |           |       |   |   |    |   |    |    |
| <b>Candidatus blochmannia</b>        |                                          |           |       |   |   |    |   |    |    |
|                                      | <i>B. floridanus</i>                     | NC_005061 |       | . | . | .  | . | .  | .  |
|                                      | <i>B. pennsylvanicus BPEN</i>            | NC_007292 |       | . | . | .  | . | .  | .  |
| <b>genus average/sub-TOTAL</b>       |                                          |           |       |   |   |    |   |    |    |
| <i>sub-TOTAL for distinct copies</i> |                                          |           |       |   |   |    |   |    |    |
| <b>Wigglesworthia</b>                |                                          |           |       |   |   |    |   |    |    |
|                                      | <i>W. glossinidia</i>                    | NC_004344 | 1     | . | . | .  | . | .  | .  |
| <b>genus average/sub-TOTAL</b>       |                                          |           | 1     |   |   |    |   |    |    |
| <i>sub-TOTAL for distinct copies</i> |                                          |           |       |   |   |    |   |    |    |
| <b>Salmonella</b>                    |                                          |           |       |   |   |    |   |    |    |
|                                      | <b>S. enterica arizonae RSK2980</b>      | NC_010067 |       | . | . | .  | . | .  | .  |
|                                      | <b>S. enterica Choleraesuis SC-B67</b>   | NC_006905 | 2     | . | . | .  | . | .  | .  |
|                                      | <b>S. enterica Schwarzengrund CVM1</b>   | NC_011094 | 2     | . | . | .  | . | .  | .  |
|                                      | <b>S. enterica Agona SL483</b>           | NC_011149 | 1     | . | . | .  | . | .  | .  |
|                                      | <b>S. enterica Dublin CT_02021853</b>    | NC_011205 | 1     | . | . | .  | . | .  | .  |
|                                      | <b>S. enterica Enteritidis P125109</b>   | NC_011294 |       | . | . | .  | . | .  | .  |
|                                      | <b>S. enterica Gallinarum 287/91</b>     | NC_011274 |       | . | . | .  | . | .  | .  |
|                                      | <b>S. enterica Heidelberg SL476</b>      | NC_011083 | 2     | . | . | .  | . | .  | .  |
|                                      | <b>S. enterica Newport SL254</b>         | NC_011080 | 2     | . | . | .  | . | .  | .  |
|                                      | <b>S. enterica Paratyphi A ATCC 9151</b> | NC_006511 |       | . | . | .  | . | .  | .  |
|                                      | <b>S. enterica Paratyphi A AKU 1260</b>  | NC_011147 |       | . | . | .  | . | .  | .  |
|                                      | <b>S. enterica Paratyphi B SPB7</b>      | NC_010102 |       | . | . | .  | . | .  | .  |
|                                      | <b>S. enterica Paratyphi C RKS4594</b>   | NC_012125 | 1     | . | . | .  | . | .  | .  |
|                                      | <b>S. enterica Typhi Ty2</b>             | NC_004631 |       | . | . | .  | . | .  | .  |
|                                      | <b>S. enterica Typhi CT18</b>            | NC_003198 | 2     | . | . | .  | . | .  | .  |
|                                      | <b>S. enterica Typhimurium LT2</b>       | NC_003197 | 1     | . | . | .  | . | .  | .  |
| <b>genus average/sub-TOTAL</b>       |                                          |           | 0.875 |   |   |    |   |    |    |
| <i>sub-TOTAL for distinct copies</i> |                                          |           |       |   |   |    |   |    |    |
| <b>Citrobacter</b>                   |                                          |           |       |   |   |    |   |    |    |
|                                      | <i>C. koseri ATCC BAA-895</i>            | NC_009792 | 2     | . | . | .  | . | .  | .  |
| <b>genus average/sub-TOTAL</b>       |                                          |           | 2     |   |   |    |   |    |    |
| <i>sub-TOTAL for distinct copies</i> |                                          |           |       |   |   |    |   |    |    |
| <b>Proteus</b>                       |                                          |           |       |   |   |    |   |    |    |
|                                      | <i>P. mirabilis HI4320</i>               | NC_010554 | 1     | . | . | .  | . | .  | .  |
| <b>genus average/sub-TOTAL</b>       |                                          |           | 1     |   |   |    |   |    |    |
| <i>sub-TOTAL for distinct copies</i> |                                          |           |       |   |   |    |   |    |    |

|                                      |                                  |           |             |           |           |           |           |            |            |
|--------------------------------------|----------------------------------|-----------|-------------|-----------|-----------|-----------|-----------|------------|------------|
| <b>Edwardsiella</b>                  |                                  |           |             |           |           |           |           |            |            |
|                                      | <i>E. ictaluri</i> 93-146        | NC_012779 |             |           |           |           |           |            |            |
| <b>genus average/sub-TOTAL</b>       |                                  |           |             |           |           |           |           |            |            |
| <i>sub-TOTAL for distinct copies</i> |                                  |           |             |           |           |           |           |            |            |
| <b>Enterobacter</b>                  |                                  |           |             |           |           |           |           |            |            |
|                                      | <i>Enterobacter</i> sp 638       | NC_009436 | 1           |           |           |           |           |            |            |
| <b>genus average/sub-TOTAL</b>       |                                  |           | 1           |           |           |           |           |            |            |
| <i>sub-TOTAL for distinct copies</i> |                                  |           |             |           |           |           |           |            |            |
| <b>Cronobacter</b>                   |                                  |           |             |           |           |           |           |            |            |
|                                      | <i>C. sakazakii</i> ATCC BAA-894 | NC_009778 | 2           |           |           |           |           |            |            |
| <b>genus average/sub-TOTAL</b>       |                                  |           | 2           |           |           |           |           |            |            |
| <i>sub-TOTAL for distinct copies</i> |                                  |           |             |           |           |           |           |            |            |
| <b>Pectobacterium/Erwinia</b>        |                                  |           |             |           |           |           |           |            |            |
|                                      | <i>E. tasmaniensis</i> Et1/99    | NC_010694 | 5           |           |           |           |           |            |            |
|                                      | <i>P. atrosepticum</i> SCRI1043  | NC_004547 |             |           |           |           |           |            |            |
|                                      | <i>P. carotovorum</i> PC1        | NC_012917 |             |           |           |           |           |            |            |
| <b>genus average/sub-TOTAL</b>       |                                  |           | 1.67        |           |           |           |           |            |            |
| <i>sub-TOTAL for distinct copies</i> |                                  |           |             |           |           |           |           |            |            |
| <b>TOTAL</b>                         |                                  |           | <b>1.20</b> | <b>10</b> | <b>56</b> | <b>77</b> | <b>55</b> | <b>198</b> | <b>109</b> |
| <i>for distinct copies</i>           |                                  |           |             | <b>8</b>  | <b>24</b> | <b>72</b> | <b>31</b> | <b>135</b> | <b>109</b> |

number of genomes with zero intron : 40
