# Supplementary material for: Selection-Driven Extinction Dynamics for Group II Introns in Enterobacteriales
Source: PubMed Central journal article supplement (PMC3522654; doi:10.1371/journal.pone.0052268), 2012-12-14
Supplement: pone.0052268.s003.pdf [file pone.0052268.s003.pdf]

## List of the 136 distinct group II intron copies, and their orthology relationships

| genus                       | Locus                  | Full-length | fragment | strain specific | evidence of retrohoming | number of orthologs | Located in a : |                        | Host genome(s)                                                      | class | size | Notes                                                                                                                                         |
|-----------------------------|------------------------|-------------|----------|-----------------|-------------------------|---------------------|----------------|------------------------|---------------------------------------------------------------------|-------|------|-----------------------------------------------------------------------------------------------------------------------------------------------|
|                             |                        |             |          |                 |                         |                     | free plasmid   | integrated MGE (no IS) |                                                                     |       |      |                                                                                                                                               |
| <b>Escherichia/Shigella</b> |                        |             |          |                 |                         |                     |                |                        |                                                                     |       |      |                                                                                                                                               |
|                             | E.c.I9-1/tr1           | X           | X        |                 |                         | 8                   |                |                        | ATCC_8739, IAI1, SE11, E24377A, EDL933, Sakai, EC4115, TW14359      | D     |      | In a Rhs region. One full-length copy in ATCC_8739, the seven other orthologues are fragments of 193 bp                                       |
|                             | E.c.I9-tr2             |             | X        |                 |                         | 3                   |                |                        | BL21, BL21_DE3, REL606                                              | D     |      | In another Rhs region. Fragment of 159 bp                                                                                                     |
|                             | E.c.I2-1               | X           |          | X               |                         | 1                   |                |                        | UMN026                                                              | D     |      | In a Rhs region.                                                                                                                              |
|                             | E.c.I3-1               | X           |          | X               |                         | 1                   |                | X                      | ED1a                                                                | D     |      | strain-specific GI                                                                                                                            |
|                             | E.c.I3-2a              | X           |          | X               |                         | 1                   |                | X                      | ED1a                                                                | D     |      | strain-specific PAI1                                                                                                                          |
|                             | E.c.I3-2b              | X           |          | X               |                         | 1                   |                | X                      | 536                                                                 | D     |      | strain-specific PAI1, inserted at a different locus compared to ED1a                                                                          |
|                             | E.c.I3-tr1             |             | X        | X               |                         | 1                   | X              |                        | E24377A                                                             | D     |      | 1419 bp fragment 96-98% similar to E.c.I-1. With internal deletion and IS insertion.                                                          |
|                             | E.c.I3-tr2             |             | X        |                 |                         | 5                   | X              |                        | Sf301, SbcCDC3083, Ss046, S. dysenteriae, Sb227                     | D     |      | 1789 bp fragment 98% similar to the E. coli E.c.I3-1. Lacks 37 bp and 900 bp of the host IS679 in 5'. 1295 bp on Sb227 + interrupted by an IS |
|                             | E.c.I3-tr3             |             | X        |                 |                         | 5                   | X              |                        | Sf301, SbcCDC3083, Ss046, S. dysenteriae, Sb227                     | D     |      | 120/122 bp fragment 95% similar to the E. coli E.c.I3-1. Same plasmid than E.c.I3-tr2                                                         |
|                             | E.c.I3-tr4             |             | X        |                 |                         | 3                   | X              |                        | Sf301, SbcCDC3083, Ss046                                            | D     |      | 360-619 bp fragment 95% similar to the E. coli E.c.I3-1. Same plasmid than E.c.I3-tr2. Grouped in Zbase with S.s.F2                           |
|                             | E.c.I4-1               | X           |          | X               |                         | 1                   |                | X                      | ED1a                                                                | A     |      | Strain-specific integrated plasmid                                                                                                            |
|                             | E.c.I4-2a              | X           |          | X               | X                       | 1                   |                | X                      | ED1a                                                                | A     |      | Evidence of retrohoming in prophage P4 (MAGE comparison with S88)                                                                             |
|                             | E.c.I4-2b              | X           |          |                 |                         | 2                   |                | X                      | E24377A, 55989                                                      | A     |      | Inserted at the same locus than in ED1a                                                                                                       |
|                             | E.c.I4-3a              | X           |          | X               |                         | 1                   |                | X                      | 55989                                                               | A     |      | strain-specific SHI-1, the IS host is a chimeric IS629/IS911                                                                                  |
|                             | E.c.I4-3b              | X           |          |                 |                         | 2                   |                | X                      | Sf301, Sf2457T                                                      | A     |      | In SHI-1 inserted at a different locus compared to 55989                                                                                      |
|                             | E.c.I4-4               | X           |          | X               |                         | 1                   |                | X                      | 55989                                                               | A     |      | In the iuc/ut 62 kbp strain-specific GI                                                                                                       |
|                             | E.c.I4-5               | X           |          | X               |                         | 1                   |                | X                      | 55989                                                               | A     |      | same strain-specific GI than E.c.I4-4                                                                                                         |
|                             | E.c.I4-6               | X           |          | X               |                         | 1                   |                | X                      | 55989                                                               | A     |      | same strain-specific GI than E.c.I4-4                                                                                                         |
|                             | E.c.I4-7               | X           |          | X               |                         | 1                   |                | X                      | 55989                                                               | A     |      | same strain-specific GI than E.c.I4-4                                                                                                         |
|                             | E.c.I4-8               | X           |          | X               | X                       | 1                   |                | X                      | E24377A                                                             | A     |      | Evidence of retrohoming (MAGE comparison with 55989)                                                                                          |
|                             | E.c.I4-9               | X           |          | X               |                         | 1                   |                | X                      | E24377A                                                             | A     |      | Strain-specific GI                                                                                                                            |
|                             | E.c.I4-10              | X           |          | X               |                         | 1                   |                |                        | IAI39                                                               | A     |      | Strain-specific IS                                                                                                                            |
|                             | E.c.I4-11              | X           |          | X               |                         | 1                   |                | X                      | IAI39                                                               | A     |      | Strain-specific GI                                                                                                                            |
|                             | E.c.I4-12              | X           |          | X               |                         | 1                   |                | X                      | IAI39                                                               | A     |      | Strain-specific prophage                                                                                                                      |
|                             | E.c.I4-13              | X           |          | X               |                         | 1                   |                | X                      | IAI39                                                               | A     |      | Strain-specific prophage                                                                                                                      |
|                             | E.c.I4-14              | X           |          | X               |                         | 1                   |                | X                      | IAI39                                                               | A     |      | Strain-specific prophage                                                                                                                      |
|                             | E.c.I4-15              | X           |          | X               |                         | 1                   |                | X                      | IAI39                                                               | A     |      | same prophage than E.c.I4-14. Host IS is a chimeric IS629/ISEc31                                                                              |
|                             | E.c.I4-16              | X           |          | X               |                         | 1                   |                |                        | IAI39                                                               | A     |      | Strain-specific IS                                                                                                                            |
|                             | E.c.I4-17              | X           |          | X               |                         | 1                   |                |                        | IAI39                                                               | A     |      | Strain-specific IS                                                                                                                            |
|                             | E.c.I4-18              | X           |          | X               |                         | 1                   | X              |                        | IAI39                                                               | A     |      | Strain-specific 33 kbp prophage                                                                                                               |
|                             | E.c.I4-19              | X           |          | X               |                         | 1                   |                |                        | IAI39                                                               | A     |      | Strain-specific IS                                                                                                                            |
|                             | E.c.I4-20              | X           |          | X               |                         | 1                   |                |                        | IAI39                                                               | A     |      | Strain-specific IS                                                                                                                            |
|                             | E.c.I4-21              | X           |          | X               |                         | 1                   |                |                        | IAI39                                                               | A     |      | Strain-specific IS                                                                                                                            |
|                             | E.c.I4-22              | X           |          | X               |                         | 1                   |                |                        | IAI39                                                               | A     |      | degraded IS                                                                                                                                   |
|                             | E.c.I4-23              | X           |          | X               |                         | 1                   |                |                        | IAI39                                                               | A     |      | Strain-specific IS                                                                                                                            |
|                             | E.c.I4-24              | X           |          | X               |                         | 1                   |                | X                      | IAI39                                                               | A     |      | Strain-specific 50 kbp prophage                                                                                                               |
|                             | E.c.I4-25              | X           |          | X               |                         | 1                   |                | X                      | SMS-3-5                                                             | A     |      | Strain-specific GI (cf SMS-3-5 publication)                                                                                                   |
|                             | E.c.I4-26              | X           |          |                 |                         | 2                   | X              |                        | UTI89, UMN026                                                       | A     |      |                                                                                                                                               |
|                             | E.c.I4-27              | X           |          | X               |                         | 1                   | X              |                        | E24377A                                                             | A     |      |                                                                                                                                               |
|                             | E.c.I4-28              | X           |          | X               |                         | 1                   | X              |                        | E24377A                                                             | A     |      | in the same plasmid than E.c.I4-27                                                                                                            |
|                             | E.c.I4-29              | X           |          | X               |                         | 1                   | X              |                        | E24377A                                                             | A     |      | in the same plasmid than E.c.I3-tr1                                                                                                           |
|                             | E.c.I4-30              | X           |          | X               |                         | 1                   | X              |                        | E24377A                                                             | A     |      |                                                                                                                                               |
|                             | E.c.I4-tr1             |             | X        |                 |                         | 4                   |                | X                      | DH10B, BW2952, MG1655, W3110                                        | A     |      | prophage CP4-6. Fragment of 1764 bp                                                                                                           |
|                             | E.c.I4-tr2             |             | X        | X               |                         | 1                   |                | X                      | SMS-3-5                                                             | A     |      | same strain-specific GI than E.c.I4-25. Fragment of 132 bp.                                                                                   |
|                             | E.c.I4-tr3             |             | X        |                 |                         | 2                   | X              |                        | UTI89, UMN026                                                       | A     |      | in the same plasmid than E.c.I4-26. Fragment of 985 bp                                                                                        |
|                             | E.c.I4-tr4             |             | X        |                 |                         | 4                   | X              |                        | Sf301, SbcCDC3083, Ss046, S. dysenteriae                            | A     |      | Fragment of 405 bp. Same plasmid than E.c.I3-tr2                                                                                              |
|                             | E.c.I5-1/tr1           | X           | X        |                 |                         | 3                   | X              |                        | EDL933, Sakai, SbcCDC3083                                           | CL1   |      | shared plasmid between the two O157:H7 strains, orthologous but truncated (577 bp) in the plasmid of Shigella boydii CDC3083                  |
|                             | E.c.I6-1a              | X           |          |                 |                         | 2                   |                | X                      | CFT073, ED1a                                                        | C     |      | in PAI SelC-Island                                                                                                                            |
|                             | E.c.I6-1b              | X           |          |                 |                         | 2                   |                | X                      | APEC_01, S88                                                        | C     |      | in the same PAI than E.c.I6-1a, but the PAI is found at a different location                                                                  |
|                             | E.c.I6-tr1             |             | X        | X               |                         | 1                   |                |                        | SMS-3-5                                                             | C     |      | 976 bp fragment, with an internal deletion. In a degraded region.                                                                             |
|                             | E.c.F10a               |             | X        | X               |                         | 1                   |                | X                      | CFT073                                                              | F     |      | 177 bp fragment in PAI SelC-Island, 77% similarity with D.a.I1                                                                                |
|                             | E.c.F10b               |             | X        |                 |                         | 2                   |                | X                      | APEC_01, S88                                                        | F     |      | 177 bp fragment in PAI SelC-Island. Same fragment than E.c.F10a, but the PAI is located at a different position.                              |
|                             | E.c.F11                |             | X        | X               |                         | 1                   |                | X                      | E24377A                                                             | D     |      | 1155 bp fragment in Strain-specific 12 kbp GI. 27 % id aa with Sh.dy.I1 ORF                                                                   |
|                             | E.c.F12                |             | X        |                 |                         | 10                  |                |                        | IAI1, SE11, E24377A, 55989, Ss046, Sb227, SbcCDC3083, Sf8401, Sf301 | C     |      | 118 bp fragment with 79% similarity with P.s.I1                                                                                               |
|                             | E.c.F13                |             | X        | X               |                         | 1                   | X              |                        | SE11                                                                | C     |      | 215 bp fragment with 77% similarity with A.v.I2                                                                                               |
|                             | E.c.F14                |             | X        | X               |                         | 1                   | X              |                        | SE11                                                                | D     |      | 500 bp fragment in the same plasmid than E.c.F14. 92% similarity with P.I.I2                                                                  |
|                             | E.c.F15                |             | X        | X               |                         | 1                   | X              |                        | E24377A                                                             | C     |      | 135 bp fragment with 81% similarity with Di.ze.I1. In the same plasmid than E.c.I3-tr1                                                        |
|                             | S.s.F1                 |             | X        |                 |                         | 4                   | X              |                        | Sf301, SbcCDC3083, Ss046, S. dysenteriae                            | D     |      | 432 bp fragment 90% similar to P.I.I2. Same plasmid than E.c.I3-tr2                                                                           |
|                             | S.s.F2                 |             | X        |                 |                         | 3                   | X              |                        | Sf301, SbcCDC3083, Ss046                                            | D     |      | 723-1436 bp fragment 89% similar to P.I.I2. Same plasmid than E.c.I3-tr2. Probably the second part of S.s.F1                                  |
|                             | S.s.F3                 |             | X        |                 |                         | 2                   | X              |                        | Ss046, S. dysenteriae                                               | D     |      | 256 bp fragment 87% similar to P.I.I2. Same plasmid than E.c.I3-tr2                                                                           |
|                             | S.b.F1                 |             | X        |                 |                         | 3                   | X              |                        | Sf301, SbcCDC3083, Sb227                                            | CL1   |      | 149 bp fragment 79% similar to A.v.I1. Same plasmid than E.c.I3-tr2                                                                           |
|                             | S.b.F2                 |             | X        |                 |                         | 3                   | X              |                        | Sf301, SbcCDC3083, Sb227                                            | D     |      | 116 bp fragment 76% similar to Ce.ja.I1. Same plasmid than E.c.I3-tr2                                                                         |
|                             | S.b.F3                 |             | X        |                 |                         | 2                   | X              |                        | Sb227, SbcCDC3083                                                   | D     |      | 196 bp fragment 77% similar to Pr.ae.I5. Same plasmid than E.c.I3-tr2                                                                         |
|                             | S.d.F1                 |             | X        |                 |                         | 2                   | X              |                        | Ss046, S. dysenteriae                                               | D     |      | 545 bp fragment 82% similar to Di.ze.I1. Same plasmid than E.c.I3-tr2                                                                         |
|                             | S.f.F4                 |             | X        | X               |                         | 1                   | X              |                        | Sf301                                                               | D     |      | 137 bp fragment 75% similar to Dh.re.I1. Same plasmid than E.c.I3-tr2                                                                         |
|                             | S.f.F5                 |             | X        | X               |                         | 1                   | X              |                        | Sf301                                                               | D     |      | 135 bp fragment 79% similar to UA.I3. Same plasmid than E.c.I3-tr2                                                                            |
|                             | S.ma.I1-tr1            |             | X        | X               |                         | 1                   | X              |                        | <i>E. fergusonii</i>                                                | E1    |      | 867 bp fragment 99% similar to S.ma.I1.                                                                                                       |
|                             | <b>total</b>           | 122         | 46       | 76              | 2                       |                     |                | 54                     | 91                                                                  |       |      |                                                                                                                                               |
|                             | <b>distinct</b>        | 67          | 40       | 27              | 2                       |                     |                | 25                     | 54                                                                  |       |      |                                                                                                                                               |
|                             | <b>Strain-specific</b> | 44          | 33       | 11              | 2                       |                     |                | 11                     | 45                                                                  |       |      |                                                                                                                                               |

| Yersinia                |    |             |   |                 |   |   |   |                                               |     |                                                                                                                          |
|-------------------------|----|-------------|---|-----------------|---|---|---|-----------------------------------------------|-----|--------------------------------------------------------------------------------------------------------------------------|
| Y.p.F1                  |    |             | X |                 | 7 | X |   | all <i>Yersinia pestis</i> strains            | A   | 1143 bp fragment. Corresponds to the Y.p.F1 fragment of Zbase.                                                           |
| Y.e.F1                  |    |             | X | X               | 1 | X |   | <i>Yersinia enterocolitica</i>                | A   | 563 bp fragment. Corresponds to the Y.e.F1 fragment of Zbase.                                                            |
| <b>total</b>            | 8  | full-length | 8 | frag on plasmid |   | 8 |   |                                               |     |                                                                                                                          |
| <b>distinct</b>         | 2  |             | 2 |                 |   | 2 |   |                                               |     |                                                                                                                          |
| <b>Strain-specific</b>  | 1  |             | 1 |                 |   | 1 |   |                                               |     |                                                                                                                          |
| Klebsiella              |    |             |   |                 |   |   |   |                                               |     |                                                                                                                          |
| Kl.pn.F1                |    |             | X | X               | 1 |   | X | MGH                                           | C   | 936 bp fragment in strain-specific 12 kbp GI. 27% aa id with G.s.I1                                                      |
| Kl.pn.F2                |    |             | X | X               | 1 |   | X | NTUH                                          | C   | 1919 bp fragment in strain-specific 60 kbp integrated plasmid. 24% id aa with Ge.sp.I1 ORF                               |
| Ps.st.I2-tr1            |    |             | X | X               | 1 | X |   | MGH                                           | CL1 | 220 bp fragment 98% similar to the Ps.st.I2 reference. In the same plasmid than S.ma.I1-2                                |
| Kl.pn.I5-1              | X  |             |   | X               | 1 |   |   | MGH                                           | E1  | Evidence of retrohoming (MAGE comparison with NTUH)                                                                      |
| Kl.pn.I5-2              | X  |             |   | X               | 1 | X |   | MGH                                           | E1  |                                                                                                                          |
| <b>total</b>            | 5  | full-length | 2 | fragments       |   | 3 |   |                                               |     |                                                                                                                          |
| <b>distinct</b>         | 5  |             | 2 |                 |   | 3 |   |                                               |     |                                                                                                                          |
| <b>Strain-specific</b>  | 5  |             | 2 |                 |   | 3 |   |                                               |     |                                                                                                                          |
| Dickeya                 |    |             |   |                 |   |   |   |                                               |     |                                                                                                                          |
| Di.da.I1                | X  |             |   |                 | 2 |   |   | <i>D.dadantii</i> , <i>D.zeae</i>             | ML  | Probably resulting from two independent insertions : 99% identity between the two introns, 90% for the flanking sequence |
| Di.ze.I1-1              | X  |             |   | X               | 1 |   |   | <i>D.zeae</i>                                 | C   | Evidence of retrohoming (MAGE comparison with <i>D. dadantii</i> )                                                       |
| Di.ze.I1-2              | X  |             |   | X               | 1 |   |   | <i>D.zeae</i>                                 | C   | Evidence of retrohoming (MAGE comparison with <i>D. dadantii</i> )                                                       |
| <b>total</b>            | 4  | full-length | 4 | fragments       |   | 2 |   |                                               |     |                                                                                                                          |
| <b>distinct</b>         | 3  |             | 3 |                 |   | 2 |   |                                               |     |                                                                                                                          |
| <b>Strain-specific</b>  | 2  |             | 2 |                 |   | 2 |   |                                               |     |                                                                                                                          |
| Photobacterium          |    |             |   |                 |   |   |   |                                               |     |                                                                                                                          |
| P.l.I1-1                | X  |             |   | X               | 1 |   | X | <i>P. luminescens</i>                         | E1  | Strain-specific 90 bp GI.                                                                                                |
| P.l.I1-tr1              |    |             | X | X               | 1 |   |   | <i>P. luminescens</i>                         | E1  | 1568 bp fragment 98-96% similar to P.l.I1-1.truncated by P.l.I2 and interrupted by an IS                                 |
| P.l.I1-tr2              |    |             | X | X               | 1 |   |   | <i>P. luminescens</i>                         | E1  | 171 bp fragment 94% similar to P.l.I1-1                                                                                  |
| P.l.I1-tr3              |    |             | X | X               | 1 |   |   | <i>P. luminescens</i>                         | E1  | 244 bp fragment 95% similar to P.l.I1-1                                                                                  |
| P.l.I2-1                | X  |             |   | X               | 1 |   |   | <i>P. luminescens</i>                         | D   |                                                                                                                          |
| P.l.F1                  |    |             | X |                 | 2 |   |   | <i>P. luminescens</i> , <i>P. asymbiotica</i> | ML  | 181-259 bp fragment 86-88% similar to Di.ze.I2                                                                           |
| P.l.F2                  |    |             | X | X               | 1 |   |   | <i>P. luminescens</i>                         | ML  | 325 bp fragment 81% similar to Di.ze.I2                                                                                  |
| P.l.F3                  |    |             | X | X               | 1 |   |   | <i>P. luminescens</i>                         | ML  | 182 bp fragment 90% similar to Di.ze.I2. 25 bp away from P.l.F2.                                                         |
| P.l.F4                  |    |             | X | X               | 1 |   |   | <i>P. luminescens</i>                         | D   | 135 bp fragment 75% similar to Zu.pr.I1                                                                                  |
| <b>total</b>            | 10 | full-length | 2 | fragments       |   | 8 |   |                                               |     |                                                                                                                          |
| <b>distinct</b>         | 9  |             | 2 |                 |   | 7 |   |                                               |     |                                                                                                                          |
| <b>Strain-specific</b>  | 8  |             | 2 |                 |   | 6 |   |                                               |     |                                                                                                                          |
| Serratia proteomaculans |    |             |   |                 |   |   |   |                                               |     |                                                                                                                          |
| Se.pr.F1                |    |             | X | X               | 1 |   |   | <i>S. proteomaculans</i>                      | C   | 978 bp fragment, with a full-length ORF. 26% id aa with Ha.ch.I2 ORF                                                     |
| Se.pr.F2                |    |             | X | X               | 1 |   |   | <i>S. proteomaculans</i>                      | C   | 196 bp fragment 95% similar to Se.pr.F1                                                                                  |
| Se.pr.F3                |    |             | X | X               | 1 |   |   | <i>S. proteomaculans</i>                      | C   | 118 bp fragment 75% similar to Kl.pn.F2                                                                                  |
| <b>total</b>            | 3  | full-length | 3 | fragments       |   | 3 |   |                                               |     |                                                                                                                          |
| <b>distinct</b>         | 3  |             | 3 |                 |   | 3 |   |                                               |     |                                                                                                                          |
| <b>Strain-specific</b>  | 3  |             | 3 |                 |   | 3 |   |                                               |     |                                                                                                                          |
| Sodalis glossinidius    |    |             |   |                 |   |   |   |                                               |     |                                                                                                                          |
| So.gl.I1-1              | X  |             |   | X               | 1 |   |   | <i>S. glossinidius</i>                        | C   | 95-97% similar to So.gl.I1-3. Interrupted by an internal deletion and IS insertion                                       |
| So.gl.I1-2              | X  |             |   | X               | 1 |   |   | <i>S. glossinidius</i>                        | C   | 99% similar to So.gl.I1-3                                                                                                |
| So.gl.I1-3              | X  |             |   | X               | 1 |   |   | <i>S. glossinidius</i>                        | C   |                                                                                                                          |
| So.gl.I1-tr1            |    |             | X | X               | 1 |   |   | <i>S. glossinidius</i>                        | C   | 806 bp fragment 94-96% similar to So.gl.I1-3                                                                             |
| So.gl.I1-tr2            |    |             | X | X               | 1 |   |   | <i>S. glossinidius</i>                        | C   | 487 bp fragment 97% similar to So.gl.I1-3                                                                                |
| So.gl.F1                |    |             | X | X               | 1 |   |   | <i>S. glossinidius</i>                        | C   | 379 bp fragment 87% similar to A.v.I2                                                                                    |
| So.gl.F2                |    |             | X | X               | 1 |   |   | <i>S. glossinidius</i>                        | C   | 846 bp fragment 75% similar to A.v.I4. Adjacent to So.gl.tr2                                                             |
| So.gl.F3                |    |             | X | X               | 1 | X |   | <i>S. glossinidius</i>                        | E1  | 279 bp fragment 80% similar to P.l.I1                                                                                    |
| <b>total</b>            | 8  | full-length | 3 | fragments       |   | 5 |   |                                               |     |                                                                                                                          |
| <b>distinct</b>         | 8  |             | 3 |                 |   | 5 |   |                                               |     |                                                                                                                          |
| <b>Strain-specific</b>  | 8  |             | 3 |                 |   | 5 |   |                                               |     |                                                                                                                          |

**Hamiltonella**

|                |   |   |   |   |  |   |                             |     |                                                                                       |
|----------------|---|---|---|---|--|---|-----------------------------|-----|---------------------------------------------------------------------------------------|
| c-Ha.de.I1-1   | X |   | X | 1 |  | X | <i>Hamiltonella defensa</i> | CL1 | All c-Ha.de.I1 have 44-47% id aa with Sm.av.I1 ORF<br>And ≥ 94% similar to each other |
| c-Ha.de.I1-2   | X |   | X | 1 |  |   | <i>Hamiltonella defensa</i> | CL1 |                                                                                       |
| c-Ha.de.I1-3   | X |   | X | 1 |  |   | <i>Hamiltonella defensa</i> | CL1 |                                                                                       |
| c-Ha.de.I1-4   | X |   | X | 1 |  |   | <i>Hamiltonella defensa</i> | CL1 |                                                                                       |
| c-Ha.de.I1-5   | X |   | X | 1 |  |   | <i>Hamiltonella defensa</i> | CL1 |                                                                                       |
| c-Ha.de.I1-6   | X |   | X | 1 |  |   | <i>Hamiltonella defensa</i> | CL1 |                                                                                       |
| c-Ha.de.I1-7   | X |   | X | 1 |  |   | <i>Hamiltonella defensa</i> | CL1 |                                                                                       |
| c-Ha.de.I1-8   | X |   | X | 1 |  |   | <i>Hamiltonella defensa</i> | CL1 |                                                                                       |
| c-Ha.de.I1-9   | X |   | X | 1 |  | X | <i>Hamiltonella defensa</i> | CL1 |                                                                                       |
| c-Ha.de.I1-10  | X |   | X | 1 |  | X | <i>Hamiltonella defensa</i> | CL1 |                                                                                       |
| c-Ha.de.I1-11  | X |   | X | 1 |  |   | <i>Hamiltonella defensa</i> | CL1 |                                                                                       |
| c-Ha.de.I1-12  | X |   | X | 1 |  |   | <i>Hamiltonella defensa</i> | CL1 |                                                                                       |
| c-Ha.de.I1-13  | X |   | X | 1 |  | X | <i>Hamiltonella defensa</i> | CL1 |                                                                                       |
| c-Ha.de.I1-14  | X |   | X | 1 |  |   | <i>Hamiltonella defensa</i> | CL1 |                                                                                       |
| c-Ha.de.I1-15  | X |   | X | 1 |  |   | <i>Hamiltonella defensa</i> | CL1 |                                                                                       |
| c-Ha.de.I1-16  | X |   | X | 1 |  |   | <i>Hamiltonella defensa</i> | CL1 |                                                                                       |
| c-Ha.de.I1-17  | X |   | X | 1 |  |   | <i>Hamiltonella defensa</i> | CL1 |                                                                                       |
| c-Ha.de.I1-18  | X |   | X | 1 |  |   | <i>Hamiltonella defensa</i> | CL1 |                                                                                       |
| c-Ha.de.I1-19  | X |   | X | 1 |  |   | <i>Hamiltonella defensa</i> | CL1 |                                                                                       |
| c-Ha.de.I1-20  | X |   | X | 1 |  | X | <i>Hamiltonella defensa</i> | CL1 |                                                                                       |
| c-Ha.de.I1-21  | X |   | X | 1 |  | X | <i>Hamiltonella defensa</i> | CL1 |                                                                                       |
| c-Ha.de.I1-22  | X |   | X | 1 |  |   | <i>Hamiltonella defensa</i> | CL1 |                                                                                       |
| c-Ha.de.I1-23  | X |   | X | 1 |  |   | <i>Hamiltonella defensa</i> | CL1 |                                                                                       |
| c-Ha.de.I1-24  | X |   | X | 1 |  |   | <i>Hamiltonella defensa</i> | CL1 |                                                                                       |
| c-Ha.de.I1-25  | X |   | X | 1 |  |   | <i>Hamiltonella defensa</i> | CL1 |                                                                                       |
| c-Ha.de.I1-26  | X |   | X | 1 |  |   | <i>Hamiltonella defensa</i> | CL1 |                                                                                       |
| c-Ha.de.I1-27  | X |   | X | 1 |  |   | <i>Hamiltonella defensa</i> | CL1 |                                                                                       |
| c-Ha.de.I1-28  | X |   | X | 1 |  |   | <i>Hamiltonella defensa</i> | CL1 |                                                                                       |
| c-Ha.de.I1-29  | X |   | X | 1 |  | X | <i>Hamiltonella defensa</i> | CL1 |                                                                                       |
| c-Ha.de.I1-tr1 |   | X | X | 1 |  |   | <i>Hamiltonella defensa</i> | CL1 |                                                                                       |
| c-Ha.de.I1-tr2 |   | X | X | 1 |  | X | <i>Hamiltonella defensa</i> | CL1 |                                                                                       |
| c-Ha.de.I1-tr3 |   | X | X | 1 |  |   | <i>Hamiltonella defensa</i> | CL1 |                                                                                       |
| c-Ha.de.I1-tr4 |   | X | X | 1 |  |   | <i>Hamiltonella defensa</i> | CL1 |                                                                                       |
| c-Ha.de.I2-1   | X |   | X | 1 |  |   | <i>Hamiltonella defensa</i> | CL1 |                                                                                       |
| c-Ha.de.F1     |   | X | X | 1 |  |   | <i>Hamiltonella defensa</i> | CL1 |                                                                                       |
| c-Ha.de.F2     |   | X | X | 1 |  |   | <i>Hamiltonella defensa</i> | CL1 |                                                                                       |
| c-Ha.de.F3     |   | X | X | 1 |  |   | <i>Hamiltonella defensa</i> | CL1 |                                                                                       |
| c-Ha.de.F4     |   | X | X | 1 |  |   | <i>Hamiltonella defensa</i> | CL1 |                                                                                       |

|                        | full-length | fragments | evidence of retrohomology | in a MGE (free or intergated) |   | classes |
|------------------------|-------------|-----------|---------------------------|-------------------------------|---|---------|
| <b>total</b>           | 38          | 30        | 8                         | 1                             | 8 | CL1     |
| <b>distinct</b>        | 38          | 30        | 8                         | 1                             | 8 |         |
| <b>Strain-specific</b> | 38          | 30        | 8                         | 1                             | 8 |         |

|                        | full-length | fragments | evidence of retrohomology | in a MGE (free or intergated) |    | classes |                   |
|------------------------|-------------|-----------|---------------------------|-------------------------------|----|---------|-------------------|
| <b>TOTAL</b>           | 198         | 87        | 111                       | 5                             | 66 | 113     | A,C,D,CL1,ML,E1,F |
| <b>distinct</b>        | 135         | 80        | 55                        | 5                             | 31 | 70      |                   |
| <b>Strain-specific</b> | 109         | 72        | 37                        | 5                             | 16 | 60      |                   |
