# Supplementary material for: Selection-Driven Extinction Dynamics for Group II Introns in Enterobacteriales
Source: PubMed Central journal article supplement (PMC3522654; doi:10.1371/journal.pone.0052268), 2012-12-14
Supplement: pone.0052268.s004.pdf [file pone.0052268.s004.pdf]

Table S3

| Element                     | Genome    | Position                                   | Orientation | Nucleotide Similarity | Element             | Genome    | Position        | Orientation | Nucleotide Similarity | Element            | Genome    | Position        | Orientation | Nucleotide Similarity |
|-----------------------------|-----------|--------------------------------------------|-------------|-----------------------|---------------------|-----------|-----------------|-------------|-----------------------|--------------------|-----------|-----------------|-------------|-----------------------|
| <b>Escherichia/Shigella</b> |           |                                            |             |                       |                     |           |                 |             |                       |                    |           |                 |             |                       |
| <b>E.c.I9-1/tr1</b>         | NC_002695 | 2050692-2050884                            | +           | 97%                   | <b>E.c.I4-1</b>     | NC_011745 | 3504972-3507242 | -           | 99%                   | <b>E.c.F10a</b>    | NC_004431 | 4296437-4296613 | -           | 77% (D.a.I1)          |
|                             | NC_002655 | 2037589-2037781                            | -           | 97%                   | <b>E.c.I4-2a</b>    | NC_011745 | 5081740-5084010 | +           | 99%                   | <b>E.c.F10b</b>    | NC_008563 | 4752376-4752552 | +           | 77% (D.a.I1)          |
|                             | NC_009801 | 1634917-1635109                            | +           | 97%                   | <b>E.c.I4-2b</b>    | NC_009801 | 4848623-4850893 | +           | 99%                   |                    | NC_011742 | 4667038-4667214 | +           | 77%                   |
|                             | NC_010468 | 2411599-2413485                            | -           | 100%                  |                     | NC_011748 | 5044258-5046528 | +           | 99%                   | <b>E.c.F11</b>     | NC_009801 | 3030090-3031244 | -           | 100% (E.c.F11)        |
|                             | NC_011353 | 1965283-1965475                            | +           | 97%                   | <b>E.c.I4-3a</b>    | NC_011748 | 3366025-3368295 | -           | 99%                   | <b>E.c.F12</b>     | NC_004741 | 3150254-3150371 | -           | 79% (P.s.I1)          |
|                             | NC_011415 | 1621095-1621287                            | +           | 97%                   | <b>E.c.I4-3b</b>    | NC_004741 | 3064669-3066938 | -           | 100%                  |                    | NC_004337 | 3161591-3161708 | -           | 79%                   |
|                             | NC_011741 | 1525528-1525720                            | +           | 97%                   |                     | NC_004337 | 3072493-3074763 | -           | 100%                  |                    | NC_007613 | 2886948-2887065 | -           | 79%                   |
|                             | NC_013008 | 1964259-1964451                            | +           | 97%                   | <b>E.c.I4-4</b>     | NC_011748 | 4751982-4754252 | +           | 99%                   |                    | NC_008258 | 3135258-3135375 | -           | 79%                   |
| <b>E.c.I9-tr2</b>           | NC_012892 | 242507-242665                              | +           | 98%                   | <b>E.c.I4-5</b>     | NC_011748 | 4767674-4769944 | -           | 99%                   |                    | NC_007384 | 3322476-3322593 | -           | 79%                   |
|                             | NC_012947 | 3539713-3539871                            | -           | 98%                   | <b>E.c.I4-6</b>     | NC_011748 | 4778304-4780574 | -           | 99%                   |                    | NC_009801 | 3499415-3499532 | -           | 79%                   |
|                             | NC_012967 | 242510-242668                              | +           | 98%                   | <b>E.c.I4-7</b>     | NC_011748 | 4789689-4791959 | +           | 99%                   |                    | NC_010658 | 3213779-3213896 | -           | 79%                   |
| <b>E.c.I2-1</b>             | NC_011751 | 269264-271154                              | +           | 99%                   | <b>E.c.I4-8</b>     | NC_009801 | 3341658-3343928 | -           | 99%                   |                    | NC_011415 | 3432487-3432604 | -           | 79%                   |
| <b>E.c.I3-1</b>             | NC_011745 | 337804-339627                              | +           | 97%                   | <b>E.c.I4-9</b>     | NC_009801 | 4833753-4836023 | -           | 99%                   |                    | NC_011741 | 3251207-3251324 | -           | 79%                   |
| <b>E.c.I3-2a</b>            | NC_011745 | 4847774-4849597                            | +           | 97%                   | <b>E.c.I4-10</b>    | NC_011750 | 489783-492052   | -           | 99%                   |                    | NC_011748 | 3518470-3518587 | -           | 79%                   |
| <b>E.c.I3-2b</b>            | NC_008253 | 4007952-4009775                            | -           | 99%                   | <b>E.c.I4-11</b>    | NC_011750 | 785326-787595   | -           | 99%                   | <b>E.c.F13</b>     | NC_011416 | 45269-45483     | +           | 77% (A.v.I2)          |
| <b>E.c.I3-tr1</b>           | NC_009788 | 27225-28063/<br>28296-28746<br>30080-30208 | -           | 98/96/97%             | <b>E.c.I4-12</b>    | NC_011750 | 919953-922222   | -           | 99%                   | <b>E.c.F14</b>     | NC_011416 | 3263-3762       | -           | 92% (P.I.I2)          |
| <b>E.c.I3-tr2</b>           | NC_004851 | 30084-31910                                | -           | 98%                   | <b>E.c.I4-13</b>    | NC_011750 | 1094728-1096997 | -           | 99%                   | <b>E.c.F15</b>     | NC_009788 | 30548-30682     | +           | 81% (Di.ze.I1)        |
|                             | NC_007608 | 32965-33803                                | -           | 99%                   | <b>E.c.I4-14</b>    | NC_011750 | 1558821-1561090 | +           | 99%                   | <b>S.s.F1</b>      | NC_004851 | 145845-146276   | -           | 90% (P.I.I2)          |
|                             | NC_007607 | 29397-31222                                | -           | 100%                  | <b>E.c.I4-15</b>    | NC_011750 | 1584588-1586857 | -           | 99%                   |                    | NC_007607 | 165788-166219   | -           | 89%                   |
|                             | NC_007385 | 29758-31491                                | -           | 99%                   | <b>E.c.I4-16</b>    | NC_011750 | 1705060-1707329 | +           | 99%                   |                    | NC_007385 | 122267-122698   | -           | 90%                   |
|                             | NC_010660 | 33803-35629                                | -           | 99%                   | <b>E.c.I4-17</b>    | NC_011750 | 1777316-1779585 | +           | 99%                   |                    | NC_010660 | 142119-142550   | -           | 90%                   |
| <b>E.c.I3-tr3</b>           | NC_004851 | 21636-21755                                | -           | 96%                   | <b>E.c.I4-18</b>    | NC_011750 | 1957302-1959571 | +           | 99%                   | <b>S.s.F2</b>      | NC_004851 | 157683-158508   | -           | 88% (P.I.I2)          |
|                             | NC_007608 | 23915-24036                                | -           | 96%                   | <b>E.c.I4-19</b>    | NC_011750 | 2077903-2080172 | +           | 99%                   |                    | NC_007385 | 134260-135695   | -           | 89%                   |
|                             | NC_007607 | 21615-21734                                | -           | 96%                   | <b>E.c.I4-20</b>    | NC_011750 | 2748227-2750496 | +           | 99%                   |                    | NC_010660 | 166256-166978   | +           | 88%                   |
|                             | NC_007385 | 19693-19812                                | -           | 95%                   | <b>E.c.I4-21</b>    | NC_011750 | 3061174-3063443 | -           | 99%                   | <b>S.s.F3</b>      | NC_007607 | 90701-90956     | -           | 87% (P.I.I2)          |
|                             | NC_010660 | 25890-26009                                | -           | 96%                   | <b>E.c.I4-22</b>    | NC_011750 | 3557284-3559553 | -           | 99%                   |                    | NC_007385 | 162435-162690   | -           | 87%                   |
| <b>E.c.I3-tr4</b>           | NC_004851 | 157225-157686                              | -           | 95%                   | <b>E.c.I4-23</b>    | NC_011750 | 3581215-3583484 | +           | 99%                   | <b>S.b.F1</b>      | NC_004851 | 82167-82315     | -           | 79% (A.v.I1)          |
|                             | NC_007608 | 35856-36311                                | +           | 99%                   | <b>E.c.I4-24</b>    | NC_011750 | 4372956-4375225 | +           | 99%                   |                    | NC_007608 | 63856-64004     | -           | 79%                   |
|                             | NC_007385 | 133641-134259                              | -           | 95%                   | <b>E.c.I4-25</b>    | NC_010498 | 3241200-3243470 | +           | 98%                   |                    | NC_010660 | 70536-70684     | -           | 79%                   |
|                             | NC_010660 | 156731-157090                              | -           | 96%                   | <b>E.c.I4-26</b>    | NC_007941 | 30449-32719     | +           | 99%                   | <b>S.b.F2</b>      | NC_004851 | 90922-91037     | -           | 76% (Ce.ja.I1)        |
| <b>E.c.I5-1/tr1</b>         | NC_002128 | 35666-38071                                | +           | 100%                  |                     | NC_011749 | 13815-16085     | -           | 99%                   |                    | NC_007608 | 34843-34958     | -           | 77%                   |
|                             | NC_007414 | 58241-60646                                | +           | 100%                  | <b>E.c.I4-27</b>    | NC_009790 | 12712-14982     | +           | 99%                   | <b>S.b.F3</b>      | NC_007608 | 34493-34688     | +           | 77% (Pr.ae.I5)        |
|                             | NC_010660 | 159649-160225                              | -           | 99%                   | <b>E.c.I4-28</b>    | NC_009790 | 23170-25439     | -           | 99%                   |                    | NC_010660 | 41254-41449     | -           | 77%                   |
| <b>E.c.I6-1a</b>            | NC_004431 | 4320108-4321914                            | +           | 100%                  | <b>E.c.I4-29</b>    | NC_009788 | 51218-53488     | +           | 99%                   | <b>S.d.F1</b>      | NC_007607 | 91024-91568     | -           | 82% (Di.ze.I1)        |
|                             | NC_011745 | 4320108-4321914                            | +           | 100%                  | <b>E.c.I4-30</b>    | NC_009786 | 13831-16100     | -           | 99%                   |                    | NC_007385 | 162758-163302   | -           | 82%                   |
| <b>E.c.I6-1b</b>            | NC_008563 | 4726907-4728713                            | -           | 99%                   | <b>E.c.I4-tr1</b>   | AC_000091 | 271415-273178   | +           | 99%                   | <b>S.f.F4</b>      | NC_004851 | 91343-91479     | -           | 75% (Dh.re.I1)        |
|                             | NC_011742 | 4641434-4643240                            | -           | 99%                   |                     | NC_000913 | 271415-273178   | +           | 99%                   | <b>S.f.F5</b>      | NC_004851 | 91611-91745     | -           | 79% (UA.I3)           |
| <b>E.c.I6-tr1</b>           | NC_010498 | 1127307-1127474/<br>1127497-1128304        | -           | 94/98%                | <b>E.c.I4-tr2</b>   | NC_012759 | 271414-273177   | +           | 99%                   | <b>S.ma.I1-tr1</b> | NC_011743 | 6501-7367       | -           | 99%                   |
|                             |           |                                            |             |                       | <b>E.c.I4-tr3</b>   | NC_010498 | 3240307-3240438 | -           | 84%                   |                    |           |                 |             |                       |
|                             |           |                                            |             |                       |                     | NC_007941 | 15211-16195     | -           | 99%                   |                    |           |                 |             |                       |
|                             |           |                                            |             |                       |                     | NC_011749 | 27904-28888     | +           | 99%                   |                    |           |                 |             |                       |
|                             |           |                                            |             |                       | <b>E.c.I4-tr4</b>   | NC_004851 | 146273-146677   | -           | 84%                   |                    |           |                 |             |                       |
|                             |           |                                            |             |                       |                     | NC_007607 | 166216-166620   | -           | 84%                   |                    |           |                 |             |                       |
|                             |           |                                            |             |                       |                     | NC_007385 | 122695-123099   | -           | 85%                   |                    |           |                 |             |                       |
|                             |           |                                            |             |                       |                     | NC_010660 | 142547-142951   | -           | 84%                   |                    |           |                 |             |                       |
| <b>Yersinia</b>             |           |                                            |             |                       |                     |           |                 |             |                       |                    |           |                 |             |                       |
| <b>Y.p.F1</b>               | NC_003134 | 76439-77581                                | -           | 93% (E.c.I4)          | <b>Y.e.F1</b>       | NC_008791 | 40232-40794     | -           | 91% (E.c.I4)          |                    |           |                 |             |                       |
|                             | NC_004838 | 54417-55559                                | +           | 93% (E.c.I4)          |                     |           |                 |             |                       |                    |           |                 |             |                       |
|                             | NC_005815 | 100480-101622                              | -           | 93% (E.c.I4)          |                     |           |                 |             |                       |                    |           |                 |             |                       |
|                             | NC_008118 | 82559-83701                                | +           | 93% (E.c.I4)          |                     |           |                 |             |                       |                    |           |                 |             |                       |
|                             | NC_008120 | 78113-79255                                | +           | 93% (E.c.I4)          |                     |           |                 |             |                       |                    |           |                 |             |                       |
|                             | NC_009378 | 118651-119793                              | +           | 93% (E.c.I4)          |                     |           |                 |             |                       |                    |           |                 |             |                       |
|                             | NC_010158 | 96211-97353                                | +           | 93% (E.c.I4)          |                     |           |                 |             |                       |                    |           |                 |             |                       |
| <b>Klebsiella</b>           |           |                                            |             |                       |                     |           |                 |             |                       |                    |           |                 |             |                       |
| <b>Kl.pn.I5-1</b>           | NC_009649 | 119263-121172                              | +           | 99%                   | <b>Ps.st.I2-tr1</b> | NC_009649 | 40012-40231     | +           | 98%                   | <b>Kl.pn.F1</b>    | NC_009648 | 3724567-3725502 | -           | 100% (Kl.pn.F1)       |
| <b>Kl.pn.I5-2</b>           | NC_009648 | 1330932-1332841                            | +           | 99%                   |                     |           |                 |             |                       | <b>Kl.pn.F2</b>    | NC_012731 | 597905-599823   | -           | 100% (Kl.pn.F2)       |

Table S3

**Dickeya**

|                 |           |               |   |      |                   |           |                 |   |      |
|-----------------|-----------|---------------|---|------|-------------------|-----------|-----------------|---|------|
| <b>Di.da.I1</b> | NC_012880 | 814296-816881 | - | 100% | <b>Di.ze.I1-1</b> | NC_012912 | 3974819-3976683 | - | 100% |
|                 | NC_012912 | 788411-790997 | - | 100% | <b>Di.ze.I1-2</b> | NC_012912 | 4627726-4629590 | + | 100% |

**Photorabdus**

|                   |           |                                     |   |        |                 |           |                 |   |      |               |           |                 |   |                |
|-------------------|-----------|-------------------------------------|---|--------|-----------------|-----------|-----------------|---|------|---------------|-----------|-----------------|---|----------------|
| <b>P.I.I1-1</b>   | NC_005126 | 1201822-1203729                     | + | 100%   | <b>P.I.I2-1</b> | NC_005126 | 1274341-1276222 | + | 100% | <b>P.I.F1</b> | NC_005126 | 5072575-5072755 | - | 87% (Ci.ro.I2) |
| <b>P.I.I1-tr1</b> | NC_005126 | 1273077-1274340/<br>1276223-1276526 | - | 98/96% |                 |           |                 |   |      | <b>P.I.F2</b> | NC_012962 | 4555061-4555319 | - | 88% (Ci.ro.I2) |
| <b>P.I.I1-tr2</b> | NC_005126 | 1300636-1300806                     | - | 94%    |                 |           |                 |   |      | <b>P.I.F3</b> | NC_005126 | 5079759-5080083 | - | 81% (Di.ze.I2) |
| <b>P.I.I1-tr3</b> | NC_005126 | 1724220-1724463                     | - | 95%    |                 |           |                 |   |      | <b>P.I.F4</b> | NC_005126 | 5080116-5080297 | - | 90% (Ci.ro.I2) |
|                   |           |                                     |   |        |                 |           |                 |   |      |               | NC_005126 | 2837265-2837404 | + | 75% (Zu.pr.I1) |

**Serratia proteomaculans**

|                 |           |                 |   |                 |                 |           |                 |   |                |                 |           |                 |   |                |
|-----------------|-----------|-----------------|---|-----------------|-----------------|-----------|-----------------|---|----------------|-----------------|-----------|-----------------|---|----------------|
| <b>Se.pr.F1</b> | NC_009832 | 4593443-4594420 | - | 100% (Se.pr.F1) | <b>Se.pr.F2</b> | NC_009832 | 4591663-4591858 | - | 95% (Se.pr.F1) | <b>Se.pr.F3</b> | NC_009832 | 1068281-1068398 | + | 76% (Kl.pn.F2) |
|-----------------|-----------|-----------------|---|-----------------|-----------------|-----------|-----------------|---|----------------|-----------------|-----------|-----------------|---|----------------|

**Sodalis glossinidius**

|                     |           |                                                   |   |           |                 |           |                 |   |              |
|---------------------|-----------|---------------------------------------------------|---|-----------|-----------------|-----------|-----------------|---|--------------|
| <b>So.gl.I1-1</b>   | NC_007712 | 144267-144782/<br>144781-145649/<br>145819-145985 | + | 95/97/96% | <b>So.gl.F1</b> | NC_007712 | 4061384-4061762 | + | 87% (A.v.I2) |
| <b>So.gl.I1-2</b>   | NC_007712 | 1926091-1927697                                   | - | 99%       | <b>So.gl.F2</b> | NC_007712 | 2754745-2755590 | + | 75% (A.v.I4) |
| <b>So.gl.I1-3</b>   | NC_007712 | 2034600-2036252                                   | + | 100%      | <b>So.gl.F3</b> | NC_007713 | 56167-56445     | + | 80% (P.I.I1) |
| <b>So.gl.I1-tr1</b> | NC_007712 | 1047315-1047755/<br>1047752-1048116               | + | 94/96%    |                 |           |                 |   |              |
| <b>So.gl.I1-tr2</b> | NC_007712 | 2755590-2756076                                   | - | 97%       |                 |           |                 |   |              |

**Hamiltonella**

|                      |           |                                 |   |         |                      |           |                                     |   |          |                       |           |                                 |   |                   |
|----------------------|-----------|---------------------------------|---|---------|----------------------|-----------|-------------------------------------|---|----------|-----------------------|-----------|---------------------------------|---|-------------------|
| <b>c-Ha.de.I1-1</b>  | NC_012751 | 262660-265005                   | - | 95%     | <b>c-Ha.de.I1-16</b> | NC_012751 | 1073294-1075639                     | + | 100%     | <b>c-Ha.de.I1-tr1</b> | NC_012751 | 790930-793141                   | - | 100%              |
| <b>c-Ha.de.I1-2</b>  | NC_012751 | 301656-304001                   | + | 100%    | <b>c-Ha.de.I1-17</b> | NC_012751 | 1132556-1134902                     | + | 99%      | <b>c-Ha.de.I1-tr2</b> | NC_012751 | 1004731-1004859                 | - | 95%               |
| <b>c-Ha.de.I1-3</b>  | NC_012751 | 356733-359077                   | - | 100%    | <b>c-Ha.de.I1-18</b> | NC_012751 | 1155626-1157971                     | + | 99%      | <b>c-Ha.de.I1-tr3</b> | NC_012751 | 1198875-1200743                 | + | 100%              |
| <b>c-Ha.de.I1-4</b>  | NC_012751 | 444534-446879                   | + | 100%    | <b>c-Ha.de.I1-19</b> | NC_012751 | 1273155-1275500                     | + | 100%     | <b>c-Ha.de.I1-tr4</b> | NC_012751 | 1233834-1234418                 | + | 100%              |
| <b>c-Ha.de.I1-5</b>  | NC_012751 | 538165-540510                   | - | 100%    | <b>c-Ha.de.I1-20</b> | NC_012751 | 1299508-1301850                     | + | 93%      |                       |           |                                 |   |                   |
| <b>c-Ha.de.I1-6</b>  | NC_012751 | 567898-570243                   | - | 99%     | <b>c-Ha.de.I1-21</b> | NC_012751 | 1304020-1306365                     | + | 100%     | <b>c-Ha.de.I2-1</b>   | NC_012751 | 935004-936265/<br>937173-938352 | + | 100/100%          |
| <b>c-Ha.de.I1-7</b>  | NC_012751 | 609654-611999                   | + | 100%    | <b>c-Ha.de.I1-22</b> | NC_012751 | 1642570-1644915                     | - | 99%      |                       |           |                                 |   |                   |
| <b>c-Ha.de.I1-8</b>  | NC_012751 | 717352-719697                   | - | 100%    | <b>c-Ha.de.I1-23</b> | NC_012751 | 1771605-1773951                     | + | 99%      | <b>c-Ha.de.F1</b>     | NC_012751 | 1098031-1098177                 | + | 100% (c-Ha.de.F1) |
| <b>c-Ha.de.I1-9</b>  | NC_012751 | 720917-723262                   | - | 99%     | <b>c-Ha.de.I1-24</b> | NC_012751 | 1823495-1825255/<br>1827601-1828185 | + | 100/100% | <b>c-Ha.de.F2</b>     | NC_012751 | 1828817-1828961                 | + | 88% (c-Ha.de.F1)  |
| <b>c-Ha.de.I1-10</b> | NC_012751 | 725420-727762                   | - | 93%     | <b>c-Ha.de.I1-25</b> | NC_012751 | 1825255-1827600                     | - | 100%     | <b>c-Ha.de.F3</b>     | NC_012751 | 2011450-2011594                 | + | 85% (c-Ha.de.F1)  |
| <b>c-Ha.de.I1-11</b> | NC_012751 | 738773-741118                   | - | 99%     | <b>c-Ha.de.I1-26</b> | NC_012751 | 1846199-1846784/<br>1849130-1850890 | - | 99/99%   | <b>c-Ha.de.F4</b>     | NC_012751 | 1421503-1421628                 | + | 83% (E.c.I8)      |
| <b>c-Ha.de.I1-12</b> | NC_012751 | 853250-855595                   | + | 100%    | <b>c-Ha.de.I1-27</b> | NC_012751 | 1846785-1849130                     | + | 100%     |                       |           |                                 |   |                   |
| <b>c-Ha.de.I1-13</b> | NC_012751 | 973312-973896/<br>976243-978002 | - | 100/99% | <b>c-Ha.de.I1-28</b> | NC_012751 | 2089107-2091452                     | + | 99%      |                       |           |                                 |   |                   |
| <b>c-Ha.de.I1-14</b> | NC_012751 | 973897-976241                   | + | 100%    | <b>c-Ha.de.I1-29</b> | NC_012752 | 18131-20476                         | + | 100%     |                       |           |                                 |   |                   |
| <b>c-Ha.de.I1-15</b> | NC_012751 | 982403-984748                   | + | 99%     |                      |           |                                     |   |          |                       |           |                                 |   |                   |
